# Supplementary material for: The Maximum Depositional Age and Provenance of Metaterrigenous Rocks of the Lykhmanivka Syncline, Middle Dnieper Domain of the Ukrainian Shield: Implications for the Relationships between Greenstone Belts and the Kryvyi Rih – Kremenchuk Basin
Source: Preprints.org preprint supplement (doi:10.20944/preprints202408.0921.v1), 2024-08-13
Supplement: Supplementary file 1 [file supplementary]

## Sheet: Table 1
Table S1. Detrital zircon U-Pb data from metasandstones of the Lykhmanivka structure of the Middle Dnieper Domain
# analysis	Concentration, ppm				Isotope ratio							Isotopic age, Ma
	U	Pb	Th	Th/U	207Pb/235U	2σ	206Pb/238U	2σ	Rho	207Pb/206Pb	2σ	207Pb/235U	2σ	206Pb/238U	2σ	207Pb/206Pb	2σ
Sample 87-551, drillhole 20803, depth 88-101 m
1	268	91	51	0.19	19.8	0.23	0.6071	0.0082	0.58	0.2355	0.0029	3083	12	3057	33	3093	19
2	45	43	24.4	0.54	22.61	0.33	0.6409	0.0095	0.52	0.2538	0.0032	3209	14	3191	37	3207	20
3	105	66	32	0.3	22.73	0.34	0.657	0.011	0.48	0.2533	0.0043	3219	14	3254	41	3206	26
4	181	95	54	0.3	17.03	0.24	0.5752	0.0081	0.78	0.2143	0.0029	2935	14	2928	33	2940	22
5	189	141	276	1.46	18.02	0.27	0.4961	0.0079	0.68	0.2639	0.0032	2989	15	2596	34	3270	19
6	161	100	51	0.32	22.11	0.3	0.637	0.011	0.79	0.253	0.0028	3190	12	3174	44	3208	17
8	33	49	26.2	0.79	20.12	0.26	0.6093	0.0095	0.43	0.2392	0.0043	3096	13	3066	38	3117	28
9	81	71	39	0.48	21.93	0.35	0.63	0.012	0.47	0.2513	0.0044	3180	15	3149	46	3191	28
10	189	347	187	0.99	16.69	0.53	0.545	0.019	0.84	0.2261	0.0072	2915	31	2801	82	3020	51
13	67	58	24.4	0.37	22.9	0.46	0.6503	0.0098	0.57	0.2538	0.0049	3221	19	3228	38	3205	31
15	93	133	70	0.76	19.93	0.27	0.612	0.0089	0.74	0.2372	0.0026	3087	13	3076	36	3102	17
16	1980	237	172	0.09	6.59	0.09	0.376	0.0054	0.66	0.1277	0.0014	2057	12	2057	26	2065	19
19	2520	231	187	0.07	6.62	0.07	0.3815	0.0055	0.62	0.1263	0.0015	2062	10	2083	26	2048	20
20	77	49	25	0.33	22.05	0.44	0.648	0.01	0.53	0.2489	0.0045	3187	19	3221	41	3184	30
22	81	77	40	0.49	23.55	0.5	0.651	0.013	0.65	0.263	0.0046	3248	21	3230	53	3263	27
25	101	49	23	0.23	22.06	0.65	0.649	0.019	0.73	0.2516	0.0055	3191	26	3236	70	3200	32
26	183	219	116	0.63	20.27	0.28	0.613	0.011	0.72	0.24	0.0033	3103	14	3082	44	3118	22
32	228	228	125	0.55	17.23	0.2	0.583	0.0081	0.77	0.2154	0.0019	2950	11	2964	34	2945	14
34	184	147	105	0.57	19.42	0.51	0.6	0.014	0.74	0.236	0.0044	3061	25	3030	57	3091	30
35	295	346	210	0.71	20	0.25	0.6121	0.0089	0.54	0.238	0.0032	3093	13	3077	36	3104	21
39	265	230	160	0.6	16.97	0.19	0.5729	0.0084	0.52	0.2132	0.0025	2934	11	2919	35	2942	21
40	185	287	196	1.06	19.4	0.28	0.595	0.015	0.66	0.2375	0.0046	3061	14	3008	61	3100	31
41	141	243	163	1.16	22.32	0.29	0.6429	0.0094	0.57	0.2513	0.0035	3196	13	3199	37	3190	22
44	52	64	47	0.9	19.64	0.51	0.605	0.01	0.06	0.2383	0.0047	3082	16	3046	42	3103	32
46	52	65	50	0.97	22.93	0.4	0.65	0.016	0.33	0.2576	0.0044	3226	18	3225	60	3232	28
Sample 87-222, drillhole 20586, depth 154-164 m
1	420	353	233	0.55	21.4	0.24	0.632	0.011	0.48	0.2471	0.0033	3156	11	3163	42	3165	21
2	2470	274	273	0.11	6.74	0.11	0.3918	0.0058	0.77	0.1247	0.0014	2077	14	2131	27	2030	20
3	71	84	55	0.78	21.24	0.36	0.621	0.011	0.38	0.2486	0.0044	3148	16	3113	43	3172	28
4	196	333	213	1.09	21.54	0.47	0.642	0.014	0.73	0.2466	0.0047	3165	20	3205	52	3170	28
5	471	349	240	0.51	17.87	0.29	0.577	0.011	0.64	0.2293	0.0036	2985	15	2936	45	3046	25
6	219	149	92.2	0.42	21.1	0.37	0.63	0.014	0.7	0.2457	0.0036	3141	17	3146	54	3155	23
7	297	179	112	0.38	22.32	0.3	0.647	0.011	0.88	0.249	0.0022	3198	13	3226	45	3179	13
8	320	195	128	0.4	19.93	0.54	0.614	0.012	0.92	0.2355	0.0036	3082	27	3083	47	3086	25
9	266	231	138	0.52	22.9	0.28	0.663	0.012	0.73	0.2508	0.0029	3222	12	3278	48	3188	18
10	127	52	32	0.25	17.42	0.29	0.5089	0.0091	0.61	0.2494	0.0034	2957	16	2651	39	3182	22
11	201	138	87	0.43	22.43	0.38	0.654	0.012	0.72	0.2508	0.0032	3201	17	3242	49	3189	20
12	102	87	51	0.5	21.03	0.25	0.6057	0.0096	0.57	0.2519	0.0035	3139	11	3057	37	3194	22
13	193	117	70	0.36	21.44	0.33	0.627	0.01	0.59	0.2485	0.0031	3157	15	3142	39	3176	19
14	198	144	81	0.41	21.77	0.32	0.6331	0.0096	0.77	0.2514	0.0034	3173	14	3161	38	3192	21
15	3810	461	447	0.12	6.9	0.1	0.3987	0.007	0.84	0.1262	0.0015	2098	13	2162	32	2048	22
17	2230	223	220	0.1	6.82	0.08	0.3912	0.0051	0.79	0.1267	0.001	2087	10	2128	24	2052	14
18	436	363	229	0.53	19	0.6	0.581	0.016	0.71	0.239	0.0045	3039	31	2949	67	3111	30
19	354	266	150	0.42	22.58	0.48	0.647	0.014	0.36	0.2565	0.0062	3212	19	3215	56	3232	41
20	66	67	35	0.53	25.91	0.32	0.72	0.011	0.61	0.2581	0.0033	3342	12	3496	40	3234	20
21	495	166	106	0.21	20	0.34	0.585	0.012	0.61	0.2477	0.0039	3090	16	2966	50	3168	25
22	280	233	126	0.45	23.21	0.36	0.682	0.013	0.72	0.247	0.0033	3235	15	3351	50	3173	19
23	3710	423	454	0.12	6.43	0.2	0.373	0.014	0.91	0.1271	0.0018	2033	27	2040	65	2056	25
24	214	240	128	0.6	23.07	0.54	0.656	0.015	0.6	0.2578	0.0052	3228	23	3275	61	3230	32
26	417	331	201	0.48	21.01	0.43	0.634	0.013	0.74	0.2407	0.0035	3137	20	3163	49	3132	22
28	341	239	160	0.47	18.32	0.24	0.5543	0.0074	0.64	0.2394	0.0024	3009	13	2847	30	3117	15
29	308	253	151	0.49	21.78	0.23	0.6387	0.0094	0.8	0.248	0.0023	3173	10	3182	37	3171	15
30	61	55	33.4	0.55	21.8	0.32	0.6351	0.0079	0.46	0.2482	0.004	3177	13	3168	31	3170	25
31	261	154	94	0.36	21.55	0.26	0.6302	0.0094	0.72	0.2498	0.0033	3170	13	3149	37	3182	21
32	130	73	46	0.35	22.34	0.43	0.64	0.014	0.59	0.2532	0.0039	3196	19	3185	57	3207	25
33	302	217	134	0.44	22.2	0.26	0.6445	0.0092	0.63	0.2491	0.0033	3194	11	3205	36	3181	20
34	196	167	85	0.43	21.72	0.43	0.64	0.013	0.91	0.2431	0.0036	3163	23	3186	53	3141	23
35	357	263	173	0.48	20.51	0.31	0.5982	0.0099	0.65	0.2502	0.0045	3115	14	3022	40	3185	28
36	229	141	81	0.36	21.58	0.26	0.6314	0.0091	0.76	0.2478	0.0026	3164	12	3154	36	3169	17
37	355	395	207	0.58	22.79	0.49	0.653	0.014	0.55	0.2562	0.0045	3220	19	3237	56	3220	28
38	299	175	109	0.36	22.22	0.56	0.653	0.017	0.79	0.2516	0.0056	3192	25	3237	66	3192	35
39	269	172	100	0.37	22.12	0.24	0.6388	0.0078	0.55	0.2508	0.0029	3188	11	3188	30	3188	18
41	303	186	113	0.37	21.2	0.28	0.623	0.01	0.67	0.2495	0.0035	3147	13	3122	42	3180	22
42	141	129	71	0.5	22.84	0.38	0.657	0.013	0.73	0.2538	0.0033	3219	17	3253	49	3207	21
43	266	227	136	0.51	22.1	0.23	0.6349	0.0086	0.63	0.254	0.0026	3189	10	3167	34	3211	16
45	280	357	178	0.64	32.41	0.39	0.732	0.011	0.72	0.323	0.0028	3562	12	3538	41	3583	14
46	213	164	97	0.46	18.94	0.25	0.5584	0.0078	0.62	0.2461	0.0028	3040	13	2864	33	3158	18
47	380	388	238	0.63	20.38	0.31	0.617	0.01	0.84	0.2388	0.0023	3110	15	3095	42	3114	15
48	409	381	180	0.44	18.41	0.72	0.564	0.017	0.91	0.2369	0.0045	3004	38	2877	71	3112	31
49	177	98	55	0.31	21.62	0.27	0.633	0.01	0.84	0.2488	0.0025	3166	12	3161	40	3176	16
50	358	278	157	0.44	21.84	0.3	0.6365	0.0098	0.69	0.2488	0.0025	3175	13	3174	39	3176	16

## Sheet: Table 2
Table S2. Detrital zircon Hf isotopic data from metasandstones of the Lykhmanivka structure of the Middle Dnieper Domain
Analysis #	207Pb/206Pb age, Ma	176Hf/177Hf	±2σ	176Lu/177Hf	±2σ	176Yb/177Hf	176Hf/177HfT	±2σ	εHfT	±2σ
Sample 87-551, drillhole 20803, depth 88-101 m
1	3093	0.280769	1.8e-05	0.000455	2e-06	0.012043	0.280755	1.8e-05	-1.1	0.6
2	3207	0.280768	1.6e-05	0.000306	6e-06	0.008247	0.280763	1.6e-05	1.8	0.6
3	2940	0.280857	1.4e-05	0.000308	1.8e-05	0.008356	0.280853	1.4e-05	-1.3	0.5
4	2065	0.281189	1.6e-05	0.000256	1.2e-05	0.007501	0.281193	1.6e-05	-9.6	0.6
5	3102	0.280779	1.8e-05	0.000814	1.8e-05	0.021001	0.280745	1.8e-05	-1.3	0.6
6	2117	0.280791	2e-05	0.000777	4.2e-05	0.021542	0.280774	2e-05	-23.3	0.7
7	3191	0.28075	1.4e-05	0.000585	1e-05	0.015019	0.280728	1.4e-05	0.2	0.5
8	3205	0.280829	1.6e-05	0.000822	2e-05	0.021149	0.280792	1.6e-05	2.8	0.6
9	3200	0.280736	1.6e-05	0.000136	4e-06	0.003635	0.280742	1.6e-05	0.9	0.5
10	3184	0.280794	1.6e-05	0.000509	1e-05	0.01286	0.280777	1.6e-05	1.8	0.6
11	3097	0.280827	1.6e-05	0.000485	8e-06	0.012175	0.280812	1.6e-05	1	0.6
12	3232	0.280768	1.6e-05	0.000646	0.000146	0.020805	0.280742	1.8e-05	1.7	0.6
13	3103	0.280768	1.6e-05	0.000191	4e-06	0.005128	0.28077	1.6e-05	-0.4	0.5
14	2942	0.280861	1.6e-05	0.000479	6e-06	0.013386	0.280848	1.6e-05	-1.4	0.6
15	3190	0.280763	1.6e-05	0.000357	4e-06	0.010387	0.280755	1.6e-05	1.1	0.6
Sample 87-222, drillhole 20586, depth 154-164 m
1	3583	0.280446	2.2e-05	0.000583	4.4e-05	0.016675	0.28042	2.2e-05	-1.5	0.8
2	3165	0.280826	1.8e-05	0.000924	3.4e-05	0.023404	0.280783	1.8e-05	1.6	0.6
3	2030	0.281147	1.6e-05	0.000408	1e-05	0.011691	0.281145	1.6e-05	-12.2	0.6
4	3182	0.28081	2e-05	0.000815	0.000122	0.021238	0.280774	2e-05	1.6	0.7
5	3086	0.280778	1.8e-05	0.000589	4.2e-05	0.014592	0.280757	2e-05	-1.2	0.7
6	3192	0.280778	2e-05	0.000619	3.8e-05	0.017551	0.280754	2e-05	1.2	0.7
7	2052	0.28114	1.6e-05	0.00028	8e-06	0.008221	0.281143	1.6e-05	-11.7	0.6
8	3111	0.280854	2e-05	0.00179	0.000262	0.050041	0.280761	2.6e-05	-0.5	0.9
9	2056	0.281135	1.4e-05	0.00045	1.2e-05	0.013106	0.281131	1.4e-05	-12	0.5
10	3170	0.280775	1.6e-05	0.000465	6e-06	0.012474	0.280761	1.6e-05	0.9	0.6
